# Supplementary material
Source: MDPI journal article supplement (https://www.mdpi.com/2073-4395/11/9/1751)
Supplement: s1 [file s1]

**A.**

*GRF1*            5' - UCGUUCAAGAAAGCCUGUGGAA - 3'  
                      : **x** | | | | | | | | | | | | | | | | **x** | | | | | | | |  
*miR396a*        3' - GUCAAGUUCUUUCG-ACACCUU - 5'

**B.**

*GRF2*            5' - UCGUUCAAGAAAGCCUGUGGAA - 3'  
                      : **x** | | | | | | | | | | | | | | | | **x** | | | | | | | |  
*miR396a*        3' - GUCAAGUUCUUUCG-ACACCUU - 5'

**C.**

*GRF3*            5' - CCGUUCAAGAAAGCCUGUGGAA - 3'  
                      | **x** | | | | | | | | | | | | | | | | **x** | | | | | | | |  
*miR396a*        3' - GUCAAGUUCUUUCG-ACACCUU - 5'

**D.**

*GRF7*            5' - UCGUUCAAGAAAGCAUGUGGAA - 3'  
                      : **x** | | | | | | | | | | | | | | | | **x** | | | | | | | |  
*miR396a*        3' - GUCAAGUUCUUUCG-ACACCUU - 5'

**E.**

*GRF8*            5' - UCGUUCAAGAAAGCAUGUGGAA - 3'  
                      : **x** | | | | | | | | | | | | | | | | **x** | | | | | | | |  
*miR396a*        3' - GUCAAGUUCUUUCG-ACACCUU - 5'

**F.**

*GRF9*            5' - ACGUUCAAGAAAGCUUGUGGAA - 3'  
                      **xx** | | | | | | | | | | | | | | | | **x** | | | | | | | |  
*miR396a*        3' - GUCAAGUUCUUUCG-ACACCUU - 5'

**Figure S1.** Schematic representation of the base pairing between the miR396a sRNA and its six target genes belonging to the *GRF* transcription factor gene family. The duplex which forms between the miR396a sRNA and its target gene transcripts (**A**) *GRF1* (*AT2G22840*), (**B**) *GRF2* (*AT4G37740*), (**D**) *GRF7* (*AT5G53660*), and (**E**) *GRF8* (*AT4G24150*) harbors 2.5 mismatched base pairings at nucleotide positions 8, 20 and 21 (G:U wobble pairing) with respect to the 5' terminus of the miR396a sRNA. The duplex which forms between the miR396a sRNA and its target gene transcripts (**C**) *GRF3* (*AT2G36400*), and (**F**) *GRF9* (*AT2G45480*) harbors 2 (nucleotide positions 8 and 20) and 3 (nucleotide positions 8, 20 and 21) mismatched base pairings respectively. (**A-E**) A mismatched base pair is represented by a cross symbol (**x**), a G:U wobble pairing is represented by a colon symbol (:), and a base pairing is depicted by an upright solid line (|).

**Supplementary Table S1:** DNA oligonucleotides used in this study for cDNA synthesis and RT-qPCR analysis.

| Transcript    | Gene ID   | Oligonucleotide sequence (5' to 3')                                                       |
|---------------|-----------|-------------------------------------------------------------------------------------------|
| P5CS1         | AT2G39800 | FP: GTTTTTGAATCCCGACCTGA                                                                  |
|               |           | RP: TTACCCCCAACAGTCTCTGG                                                                  |
| GRF1          | AT2G22840 | FP: CGTCGCATAAACAAGCCTCG                                                                  |
|               |           | RP: ATTTTCAGCTCTTCGGGCCAA                                                                 |
| GRF2          | AT4G37740 | FP: CTTGGCCTGAAGAGCTGACA                                                                  |
|               |           | RP: GTGTGTGGAGGAAGGGGATG                                                                  |
| GRF3          | AT2G36400 | FP: CCATACGAGTCCCACATCGG                                                                  |
|               |           | RP: CTGAGCTCATGGGGCTTGAA                                                                  |
| GRF7          | AT5G53660 | FP: CATCCCCACCGTTAGATCG                                                                   |
|               |           | RP: TGCTTCCATGCTTCCGACAT                                                                  |
| GRF8          | AT4G24150 | FP: GCTGCTGTGACTGTAGCAGA                                                                  |
|               |           | RP: CTCATGCCATTGAGCTTCGC                                                                  |
| GRF9          | AT2G45480 | FP: CTCACATGAGAATGCCGGGT                                                                  |
|               |           | RP: ATCAGAAACTCGGGGCAGTG                                                                  |
| NCER1         | AT5G58980 | FP: GACCAGGCTACCCTGATGAA                                                                  |
|               |           | RP: TGCATGACGATAGTCAACTTTCC                                                               |
| NCER2         | AT1G07380 | FP: TGAGATGTGCTATGGGCGTG                                                                  |
|               |           | RP: TGGCGGTAATCAACCTTCCC                                                                  |
| NCER3         | AT2G38010 | FP: TCCGGGCTACCCTGATGAAT                                                                  |
|               |           | RP: CCCCTGCAGCTTCTCTGTAG                                                                  |
| UBI10         | AT4G05320 | FP: GGCCTTGTATAATCCCTGATGAATAAG                                                           |
|               |           | RP: AAAGAGATAACAGGAACGAAACATA                                                             |
| Universal-SLR |           | RP: CCAGTGCAGGGTCCGAGGTA                                                                  |
| snoR101       |           | FP: CTTACAGGTAAGTTCGCTTG                                                                  |
|               |           | RP: AGCATCAGCAGACCAGTAGTT                                                                 |
| miR396        |           | FP: GCGCGTTCCACAGCTTTCTTGAAC<br>RTSL: GTCGTATCCAGTGCAGGGTCCGAGGTATTTCGCACTGGATACGACAAGTTC |
